# Supplementary material for: Occupational Exposure Assessment to Antineoplastic Drugs in Nine Italian Hospital Centers over a 5-Year Survey Program
Source: MDPI journal article supplement (doi:10.3390/ijerph19148601), 2022-07-14
Supplement: s1 [file s1]

| PHARMACY AREAS |            |           |                     |        |            |           |                     |        |
|----------------|------------|-----------|---------------------|--------|------------|-----------|---------------------|--------|
| Years          | CP         |           |                     |        | GEM        |           |                     |        |
|                | Wipes      | Pads      | Odds Ratio (95% CI) | pvalue | Wipes      | Pads      | Odds Ratio (95% CI) | pvalue |
| 2016           | 37 (42)    | 1 (5.6)   | 0.08 (0.01 to 0.64) | 0.017  | 32 (36.4)  | 5 (27.8)  | 0.67 (0.22 to 2.06) | 0.488  |
| 2017           | 23 (24)    | 2 (11.1)  | 0.4 (0.08 to 1.86)  | 0.24   | 34 (35.4)  | 7 (38.9)  | 1.16 (0.41 to 3.27) | 0.778  |
| 2019           | 46 (43.8)  | 8 (38.1)  | 0.79 (0.3 to 2.06)  | 0.63   | 34 (32.4)  | 7 (33.3)  | 1.04 (0.39 to 2.82) | 0.932  |
| 2020           | 79 (75.2)  | 2 (11.1)  | 0.04 (0.01 to 0.19) | <0.001 | 87 (82.9)  | 6 (33.3)  | 0.1 (0.03 to 0.31)  | <0.001 |
| 2021           | 64 (67.4)  | 0 (0)     | ND                  | ND     | 76 (80)    | 10 (55.6) | 0.31 (0.11 to 0.9)  | 0.031  |
| 2016-2021      | 249 (50.9) | 13 (14.0) | 0.16 (0.08 to 0.29) | <0.001 | 263 (53.8) | 35 (37.6) | 0.52 (0.33 to 0.82) | 0.005  |
|                | 5-FU       |           |                     |        | Pi         |           |                     |        |
|                | Wipes      | Pads      | Odds Ratio (95% CI) | pvalue | Wipes      | Pads      | Odds Ratio (95% CI) | pvalue |
| 2016           | 19 (21.6)  | 5 (27.8)  | 1.4 (0.44 to 4.41)  | 0.569  | 41 (46.6)  | 4 (22.2)  | 0.33 (0.1 to 1.07)  | 0.065  |
| 2017           | 19 (19.8)  | 6 (33.3)  | 2.03 (0.67 to 6.09) | 0.209  | 37 (38.5)  | 1 (5.6)   | 0.09 (0.01 to 0.73) | 0.024  |
| 2019           | 24 (22.9)  | 10 (47.6) | 3.07 (1.16 to 8.09) | 0.023  | 27 (25.7)  | 4 (19)    | 0.68 (0.21 to 2.2)  | 0.519  |
| 2020           | 57 (54.3)  | 2 (11.1)  | 0.11 (0.02 to 0.48) | 0.004  | 45 (42.9)  | 1 (5.6)   | 0.08 (0.01 to 0.61) | 0.015  |
| 2021           | 21 (22.1)  | 5 (27.8)  | 1.36 (0.43 to 4.24) | 0.601  | 65 (68.4)  | 4 (22.2)  | 0.13 (0.04 to 0.43) | 0.001  |
| 2016-2021      | 140 (28.6) | 28 (30.1) | 1.07 (0.66 to 1.74) | 0.773  | 215 (44.0) | 14 (15.1) | 0.23 (0.12 to 0.41) | <0.001 |

  

| PATIENT CARE UNITS |            |          |                     |        |            |           |                     |        |
|--------------------|------------|----------|---------------------|--------|------------|-----------|---------------------|--------|
| Years              | CP         |          |                     |        | GEM        |           |                     |        |
|                    | Wipes      | Pads     | Odds Ratio (95% CI) | pvalue | Wipes      | Pads      | Odds Ratio (95% CI) | pvalue |
| 2016               | 158 (68.1) | 12 (16)  | 0.09 (0.05 to 0.18) | <0.001 | 156 (67.2) | 13 (17.3) | 0.1 (0.05 to 0.2)   | <0.001 |
| 2017               | 104 (44.1) | 5 (7.2)  | 0.1 (0.04 to 0.26)  | <0.001 | 163 (69.1) | 17 (24.6) | 0.15 (0.08 to 0.27) | <0.001 |
| 2019               | 159 (64.4) | 2 (4.4)  | 0.03 (0.01 to 0.11) | <0.001 | 152 (61.5) | 8 (17.8)  | 0.14 (0.06 to 0.3)  | <0.001 |
| 2020               | 162 (76.8) | 4 (12.1) | 0.04 (0.01 to 0.12) | <0.001 | 164 (77.7) | 12 (36.4) | 0.16 (0.08 to 0.36) | <0.001 |
| 2021               | 193 (68.4) | 4 (6.7)  | 0.03 (0.01 to 0.09) | <0.001 | 217 (77)   | 6 (10)    | 0.03 (0.01 to 0.08) | <0.001 |
| 2016-2021          | 776 (64.2) | 27 (9.6) | 0.04 (0.04 to 0.09) | <0.001 | 852 (70.5) | 56 (19.9) | 0.08 (0.08 to 0.14) | <0.001 |
|                    | 5-FU       |          |                     |        | Pi         |           |                     |        |
|                    | Wipes      | Pads     | Odds Ratio (95% CI) | pvalue | Wipes      | Pads      | Odds Ratio (95% CI) | pvalue |
| 2016               | 57 (24.6)  | 5 (6.7)  | 0.22 (0.08 to 0.57) | 0.002  | 182 (78.4) | 5 (6.7)   | 0.02 (0.01 to 0.05) | 0.001  |
| 2017               | 73 (30.9)  | 7 (10.1) | 0.25 (0.11 to 0.58) | 0.001  | 170 (72)   | 6 (8.7)   | 0.04 (0.02 to 0.09) | 0.001  |
| 2019               | 103 (41.7) | 4 (8.9)  | 0.14 (0.05 to 0.39) | <0.001 | 124 (50.2) | 0 (0)     | NA                  | NA     |
| 2020               | 115 (54.5) | 2 (6.1)  | 0.05 (0.01 to 0.23) | <0.001 | 130 (61.6) | 1 (3)     | 0.02 (0 to 0.15)    | 0.001  |
| 2021               | 53 (18.8)  | 2 (3.3)  | 0.15 (0.04 to 0.63) | <0.001 | 218 (77.3) | 2 (3.3)   | 0.01 (0 to 0.04)    | 0.001  |
| 2016-2021          | 401 (33.2) | 20 (7.1) | 0.06 (0.1 to 0.25)  | <0.001 | 824 (68.2) | 14 (5)    | 0.02 (0.01 to 0.04) | <0.001 |

**Table S1.** Statistical parameters and Odds Ratios values in pharmacy areas and patient care units.
